# Supplementary material for: Procalcitonin and C-reactive protein to rule out early bacterial coinfection in COVID-19 critically ill patients
Source: PubMed Central journal article supplement — Intensive Care Med. 2023 Jul 28;49(8):934–45. doi: 10.1007/s00134-023-07161-1 (PMC10425511; doi:10.1007/s00134-023-07161-1), 2023-07-28
Supplement: 134_2023_7161_MOESM1_ESM.pdf [file 134_2023_7161_MOESM1_ESM.pdf]

## Table of Contents

|                                                                                                                                                                                                                                           |    |
|-------------------------------------------------------------------------------------------------------------------------------------------------------------------------------------------------------------------------------------------|----|
| eTable 1. List of participating centers                                                                                                                                                                                                   | 2  |
| eTable 2. Missing data map of variables including in the multivariable analyses                                                                                                                                                           | 4  |
| eTable 3. Timing of antibiotics administration in the overall population                                                                                                                                                                  | 5  |
| eTable 4. Microorganisms of bacterial coinfection                                                                                                                                                                                         | 6  |
| eTable 5. Sample of bacterial coinfection                                                                                                                                                                                                 | 7  |
| eTable 6. ICU outcome                                                                                                                                                                                                                     | 8  |
| eTable 7. Multivariable models assessing predictors of 30-day mortality, using cut-off values of procalcitonin and C-reactive protein (N = 4,076)                                                                                         | 9  |
| eTable 8. Multivariable models assessing predictors of 90-day mortality, using cut-off values of procalcitonin and C-reactive protein (N = 4,076)                                                                                         | 10 |
| eTable 9. Association of procalcitonin and C-reactive protein with bacterial coinfection, using cut-off values of procalcitonin and C-reactive protein, by septic shock                                                                   | 11 |
| eTable 10. Association of procalcitonin and C-reactive protein with bacterial coinfection, using cut-off values of procalcitonin and C-reactive protein, by non-respiratory SOFA score                                                    | 12 |
| eTable 11. Association of procalcitonin and C-reactive protein with bacterial coinfection, using cut-off values of procalcitonin and C-reactive protein, by symptoms timing                                                               | 13 |
| eFigure 1. Flow diagram of the study population                                                                                                                                                                                           | 14 |
| eFigure 2. Receiver operating characteristic curve of procalcitonin and C-reactive protein for identification of bacterial coinfection                                                                                                    | 15 |
| eFigure 3. Receiver operating characteristic curve of procalcitonin and C-reactive protein for identification of bacterial coinfection according to septic shock (No septic shock - Panel A, Septic shock - Panel B)                      | 16 |
| eFigure 4. Receiver operating characteristic curve of procalcitonin and C-reactive protein for identification of bacterial coinfection according to SOFA (without respiratory system component) (<2 - Panel A, ≥2 - Panel B)              | 17 |
| eFigure 5. Procalcitonin (Panel A) and C-reactive protein (Panel B) according to time from first symptoms to hospital admission and bacterial coinfection                                                                                 | 18 |
| eFigure 6. Receiver operating characteristic curve of procalcitonin and C-reactive protein for identification of bacterial coinfection according to time from first symptoms to hospital admission (<3 days - Panel A, ≥3 days - Panel B) | 19 |

**eTable 1. List of participating centers**

| <b>Site</b>                                          |
|------------------------------------------------------|
| Hospital Universitario Marqués de Valdecilla         |
| Hospital Germans Trias i Pujol                       |
| Hospital Universitario de Torrejón                   |
| Hospital Universitario de Basurto                    |
| Hospital Universitari Joan XXIII de Tarragona        |
| Hospital Universitario de Cruces                     |
| Hospital Universitario de la Princesa                |
| Hospital Universitario Reina Sofia, Córdoba          |
| Hospital Universitario de Gran Canaria Doctor Negrín |
| Hospital General de Segovia                          |
| Hospital Universitari Son Espases                    |
| HM Hospitales Madrid                                 |
| Hospital Virgen del Rocío                            |
| Hospital Virgen Macarena                             |
| Hospital San Juan de Dios                            |
| Hospital General Universitario Gregorio Marañón      |
| Hospital Universitario de Getafe                     |
| Hospital Universitario Ramón y Cajal                 |
| Hospital Universitario Río Hortega                   |
| Hospital Universitario Príncipe de Asturias          |
| Hospital Punta de Europa-Algeciras                   |
| Hospital Universitario 12 de Octubre                 |
| Hospital Universitario Sant Joan d'Alacant           |
| Hospital Universitario Lucus Augusti                 |
| Hospital Nuestra Señora de Gracia                    |
| Hospital Universitario de Móstoles                   |
| Hospital Universitari Bellvitge                      |
| Hospital Clinic Barcelona                            |
| Clínica Sagrada Familia                              |
| Hospital Universitario Vall d'Hebron                 |
| Hospital Clínico Universitario de Valladolid         |
| Hospital de León                                     |
| Hospital Universitari Arnau de Vilanova              |
| Hospital San Pedro de Alcántara                      |
| Hospital Sagrat Cor                                  |
| Hospital Infanta Leonor de Madrid                    |
| Hospital La Fe de Valencia                           |

---

**Site**

Hospital Universitari Mútua Terrassa

Hospital del Mar

Hospital Universitario Central de Asturias

Hospital de Mataró

Hospital Virgen De Valme

Complejo Hospitalario Universitario de Ourense

Hospital General Río Carrión

Hospital Universitario La Paz

Hospital Álvaro Cunqueiro

Hospital Universitario de Salamanca

Hospital de Tortosa Verge de la Cinta

Hospital Clínic Universitari de València

Hospital Son Llàtzer

Hospital de Santa Maria

Hospital Universitario de Jerez de la Frontera

Hospital Universitario San Agustín

Hospital Parc Taulí

Hospital Clínico Universitario de Santiago

---

**eTable 2. Missing data map of variables including in the multivariable analyses**

| Variables                                                      | No bacterial coinfection<br>(N = 3,943) |         |           | Bacterial coinfection<br>(N = 133) |         |           |
|----------------------------------------------------------------|-----------------------------------------|---------|-----------|------------------------------------|---------|-----------|
|                                                                | N                                       |         |           | N                                  |         |           |
|                                                                | N Valid                                 | Missing | % Missing | N Valid                            | Missing | % Missing |
| Age                                                            | 3,943                                   | 0       | 0%        | 133                                | 0       | 0%        |
| Sex                                                            | 3,940                                   | 3       | 0%        | 133                                | 0       | 0%        |
| BMI                                                            | 3,518                                   | 425     | 11%       | 124                                | 9       | 7%        |
| Comorbidities                                                  | 3,943                                   | 0       | 0%        | 133                                | 0       | 0%        |
| SOFA (without respiratory system component)                    | 2,750                                   | 1,193   | 30%       | 93                                 | 40      | 30%       |
| PaO <sub>2</sub> /FiO <sub>2</sub> ratio at hospital admission | 2,874                                   | 1,069   | 27%       | 119                                | 14      | 11%       |
| Procalcitonin at hospital admission                            | 2,800                                   | 1,143   | 29%       | 101                                | 32      | 24%       |
| C-reactive protein at hospital admission                       | 3,903                                   | 40      | 1%        | 133                                | 0       | 0%        |
| Leucocyte count at hospital admission                          | 3,921                                   | 22      | 1%        | 132                                | 1       | 1%        |
| Respiratory support at hospital admission                      | 3,913                                   | 30      | 1%        | 133                                | 0       | 0%        |
| Septic shock at hospital admission                             | 3,858                                   | 85      | 2%        | 116                                | 17      | 13%       |

Abbreviations: BMI indicates body mass index; PaO<sub>2</sub>, partial pressure of arterial oxygen; FiO<sub>2</sub>, fraction of inspired oxygen. We used the multiple imputation method (Sterne JAC et al, BMJ 2009; 338:b2393)(Omar R, E. W. Biometrics 2010) for missing data to generate 30 datasets in which missing values are replaced with plausible estimates. The model for multiple imputation included all covariates of the multivariable analyses. We used the AUTO method which scans the data to determine the best imputation method (monotone or FCS). The monotone method is an efficient method for data that have a monotone pattern of missingness. Fully conditional specification (FCS) is an iterative Markov Chain Monte Carlo (MCMC) method that is appropriate when the data have an arbitrary (monotone or nonmonotone) missing pattern.

**eTable 3. Timing of antibiotics administration in the overall population**

| Variables                    | No bacterial coinfection | Bacterial coinfection | Total     |
|------------------------------|--------------------------|-----------------------|-----------|
|                              | (N = 3,943)              | (N = 133)             | (N=4076)  |
|                              | N                        | N                     | N         |
| ≤48h from hospital admission | 2906 (74)                | 118 (89)              | 3024 (74) |
| >48h from hospital admission | 747 (19)                 | 11 (8)                | 758 (19)  |
| No antibiotics               | 261 (6)                  | 1 (<1)                | 262 (6)   |
| Data missing                 | 29 (<1)                  | 3 (<1)                | 32 (<1)   |

Variables are expressed as n (%). The percentages are related to the number of patients.

**eTable 4. Microorganisms of bacterial coinfection**

| <b>Aetiology</b>                                   | <b>Bacterial coinfection<br/>(N = 133)</b> |
|----------------------------------------------------|--------------------------------------------|
| <i>Staphylococcus aureus</i>                       | 44 (33)                                    |
| <i>Streptococcus pneumoniae</i>                    | 40 (30)                                    |
| <i>Haemophilus influenzae</i>                      | 15 (11)                                    |
| <i>Pseudomonas aeruginosa</i>                      | 9 (7)                                      |
| <i>Escherichia coli</i>                            | 8 (6)                                      |
| <i>Klebsiella species</i>                          | 6 (5)                                      |
| <i>Legionella species</i>                          | 3 (2)                                      |
| <i>Methicillin Resistant Staphylococcus aureus</i> | 3 (2)                                      |
| <i>Streptococcus species</i>                       | 3 (2)                                      |
| <i>ESBL Klebsiella pneumoniae</i>                  | 2 (2)                                      |
| <i>Moraxella catarrhalis</i>                       | 2 (2)                                      |
| <i>Stenotrophomonas maltophilia</i>                | 2 (2)                                      |
| <i>Enterobacter species</i>                        | 1 (1)                                      |
| <i>Mycoplasma pneumoniae</i>                       | 1 (1)                                      |
| <i>Serratia species</i>                            | 1 (1)                                      |
| Other                                              | 1 (1)                                      |

Variables are expressed as n (%). The percentages of pathogens are related to the number of patients.

6 patients have 2 microorganisms and 1 patient has 3 microorganisms.

**eTable 5. Sample of bacterial coinfection**

| <b>Sample</b>                        | <b>Intubated patients<sup>a</sup><br/>(N = 99)</b> | <b>Non intubated patients<sup>a</sup><br/>(N = 34)</b> | <b>Total<br/>(N = 133)</b> |
|--------------------------------------|----------------------------------------------------|--------------------------------------------------------|----------------------------|
| Tracheal aspirate                    | 64 (64)                                            | 2 (6)                                                  | 67 (50)                    |
| Bronchoalveolar lavage               | 4 (4)                                              | 0 (0)                                                  | 4 (3)                      |
| Sputum                               | 6 (6)                                              | 19 (56)                                                | 24 (18)                    |
| Nasopharyngeal / oropharyngeal swabs | 4 (4)                                              | 4 (12)                                                 | 8 (6)                      |
| Hemoculture                          | 3 (3)                                              | 2 (6)                                                  | 5 (4)                      |
| Urine                                | 14 (14)                                            | 11 (32)                                                | 25 (19)                    |
| Other                                | 7 (7)                                              | 1 (3)                                                  | 8 (6)                      |

Variables are expressed as n (%). The percentages of samples are related to the number of patients. 6 patients have 2 samples and 1 patient has 3 samples. <sup>a</sup> During the first 48 hours from hospital admission.

**eTable 6. ICU outcome**

| Variables                                                                     | No bacterial<br>coinfection<br>(N = 3,943) | Bacterial<br>coinfection<br>(N = 133) | P-value      |
|-------------------------------------------------------------------------------|--------------------------------------------|---------------------------------------|--------------|
| In-hospital mortality, n (%)                                                  | 1,125 (29)                                 | 43 (32)                               | 0.346        |
| 15-day mortality, n (%) <sup>a</sup>                                          | 420 (11)                                   | 19 (15)                               | 0.194        |
| 30-day mortality, n (%) <sup>b</sup>                                          | 839 (22)                                   | 33 (26)                               | 0.321        |
| 90-day mortality, n (%) <sup>c</sup>                                          | 1,128 (31)                                 | 44 (37)                               | 0.160        |
| Length of ICU stay, median (Q1; Q3), days                                     |                                            |                                       |              |
| All patients                                                                  | 13 (7; 27)                                 | 17 (9; 33)                            | <b>0.017</b> |
| Surviving patients                                                            | 12 (7; 27)                                 | 17.5 (9; 34)                          | <b>0.002</b> |
| Length of hospital stay, median (Q1; Q3), days                                |                                            |                                       |              |
| All patients                                                                  | 24 (15; 41)                                | 24 (14; 43)                           | 0.923        |
| Surviving patients                                                            | 25 (16; 45)                                | 29.5 (17; 49)                         | 0.193        |
| Ventilator-free days, median (Q1; Q3)                                         | 0 (0; 17)                                  | 0 (0; 16)                             | 0.764        |
| Invasive mechanical ventilation length, median (Q1; Q3),<br>days <sup>d</sup> |                                            |                                       |              |
| All patients                                                                  | 15 (8; 27)                                 | 16.5 (8; 27)                          | 0.452        |
| Surviving patients                                                            | 14 (8; 26)                                 | 15 (8; 28)                            | 0.310        |
| ICU-free days, median (Q1; Q3)                                                | 5 (0; 19)                                  | 0 (0; 16)                             | <b>0.006</b> |

Abbreviations: ICU indicates intensive care unit; Q1, first quartile; Q3, third quartile. Percentages calculated on non-missing data. P-values marked in bold indicate numbers that are statistically significant on the 95% confidence limit. <sup>a</sup> Calculated only for patients with 15-day follow-up (3,826 in the no bacterial coinfection group and 130 in the bacterial coinfection group). <sup>b</sup> Calculated only for patients with 30-day follow-up (3,740 in the no bacterial coinfection group and 126 in the bacterial coinfection group). <sup>c</sup> Calculated only for patients with 90-day follow-up (3,648 in the no bacterial coinfection group and 119 in the bacterial coinfection group). <sup>d</sup> Duration of invasive mechanical ventilation was measured from initiation of ventilation until either successful extubation, successful permanent disconnection or death.



**eTable 7. Multivariable models assessing predictors of 30-day mortality, using cut-off values of procalcitonin and C-reactive protein (N = 4,076)**

| <b>Variables</b>                                                     | <b>Adjusted HR (95% CI)<sup>a</sup></b> | <b>P-value</b> |
|----------------------------------------------------------------------|-----------------------------------------|----------------|
| Procalcitonin at hospital admission $\geq 0.12$ ng/mL <sup>b</sup>   | 1.17 (0.97 to 1.40)                     | 0.094          |
| C-reactive protein at hospital admission $\geq 97$ mg/L <sup>b</sup> | 1.02 (0.87 to 1.19)                     | 0.839          |

Abbreviations: HR indicates hazard ratio; CI, confidence interval; BMI, body mass index. Cox regression model stratified on the center variable and adjusted by COVID-19 wave. Data are shown as estimated HRs (95% CIs) of the explanatory variables in the 30-day mortality group. The P-value is based on the null hypothesis that all ORs relating to an explanatory variable equal unity (no effect). P-values marked in bold indicate numbers that are statistically significant on the 95% confidence limit. <sup>a</sup> Adjusted for variables (age, sex, BMI, comorbidities, SOFA (without respiratory system component), PaO<sub>2</sub>/FiO<sub>2</sub> ratio at hospital admission, respiratory support at hospital admission, leucocyte count  $\geq 11 \times 10^9$ /L, septic shock, bacterial coinfection, and COVID-19 wave). <sup>b</sup> Cut-off value obtained from ROC curve for bacterial coinfection (value with a sensitivity of 80%).

**eTable 8. Multivariable models assessing predictors of 90-day mortality, using cut-off values of procalcitonin and C-reactive protein (N = 4,076)**

| <b>Variables</b>                                                     | <b>Adjusted HR (95% CI)<sup>a</sup></b> | <b>P-value</b> |
|----------------------------------------------------------------------|-----------------------------------------|----------------|
| Procalcitonin at hospital admission $\geq 0.12$ ng/mL <sup>b</sup>   | 1.20 (1.03 to 1.40)                     | <b>0.022</b>   |
| C-reactive protein at hospital admission $\geq 97$ mg/L <sup>b</sup> | 1.00 (0.88 to 1.15)                     | 0.942          |

Abbreviations: HR indicates hazard ratio; CI, confidence interval; BMI, body mass index. Cox regression model stratified on the center variable and adjusted by COVID-19 wave. Data are shown as estimated HRs (95% CIs) of the explanatory variables in the 30-day mortality group. The P-value is based on the null hypothesis that all ORs relating to an explanatory variable equal unity (no effect). P-values marked in bold indicate numbers that are statistically significant on the 95% confidence limit. <sup>a</sup> Adjusted for variables (age, sex, BMI, comorbidities, SOFA (without respiratory system component), PaO<sub>2</sub>/FiO<sub>2</sub> ratio at hospital admission, respiratory support at hospital admission, leucocyte count  $\geq 11 \times 10^9/L$ , septic shock, bacterial coinfection, and COVID-19 wave). <sup>b</sup> Cut-off value obtained from ROC curve for bacterial coinfection (value with a sensitivity of 80%).

**eTable 9. Association of procalcitonin and C-reactive protein with bacterial coinfection, using cut-off values of procalcitonin and C-reactive protein, by septic shock**

| Variables                                                              | Adjusted OR (95% CI) <sup>a</sup> | P-value      |
|------------------------------------------------------------------------|-----------------------------------|--------------|
| No septic shock (N = 3,880)                                            |                                   |              |
| Procalcitonin at hospital admission $\geq 0.10$ ng/mL <sup>b</sup>     | 0.91 (0.54 to 1.56)               | 0.738        |
| C-reactive protein at hospital admission $\geq 92.5$ mg/L <sup>b</sup> | 2.08 (1.24 to 3.51)               | <b>0.006</b> |
| Septic shock (N = 94)                                                  |                                   |              |
| Procalcitonin at hospital admission $\geq 0.11$ ng/mL <sup>b</sup>     | 81.10 (1.71 to 3,850.77)          | <b>0.026</b> |
| C-reactive protein at hospital admission $\geq 100$ mg/L <sup>b</sup>  | 1.41 (0.01 to 197.54)             | 0.892        |

Abbreviations: OR indicates odds ratio; CI, confidence interval; BMI, body mass index; PaO<sub>2</sub>, partial pressure of arterial oxygen; FiO<sub>2</sub>, fraction of inspired oxygen. Mixed-effects models with center variable as a random effect. Data are shown as estimated ORs (95% CIs) of the explanatory variables in the bacterial coinfection group. The P-value is based on the null hypothesis that all ORs relating to an explanatory variable equal unity (no effect). P-values marked in bold indicate numbers that are statistically significant on the 95% confidence limit. Area under the ROC curve, AUC for no septic shock model = 0.76 (95% CI 0.72 to 0.80); AUC for septic shock model = 0.98 (95% CI 0.94 to 1.00). <sup>a</sup> Adjusted for variables (age, sex, BMI, comorbidities, SOFA (without respiratory system component), PaO<sub>2</sub>/FiO<sub>2</sub> ratio at hospital admission, leucocyte count  $\geq 11 \times 10^9$ /L, and COVID-19 wave). <sup>b</sup> Cut-off value obtained from ROC curve for bacterial coinfection (value with a sensitivity of 80%).

**eTable 10. Association of procalcitonin and C-reactive protein with bacterial coinfection, using cut-off values of procalcitonin and C-reactive protein, by non-respiratory SOFA score**

| Variables                                                             | Adjusted OR (95% CI) <sup>a</sup> | P-value      |
|-----------------------------------------------------------------------|-----------------------------------|--------------|
| Non-respiratory SOFA score <2 (N = 1,518)                             |                                   |              |
| Procalcitonin at hospital admission $\geq 0.09$ ng/mL <sup>b</sup>    | 0.82 (0.34 to 1.98)               | 0.655        |
| C-reactive protein at hospital admission $\geq 104$ mg/L <sup>b</sup> | 3.18 (1.32 to 7.62)               | <b>0.010</b> |
| Non-respiratory SOFA score $\geq 2$ (N = 1, 325)                      |                                   |              |
| Procalcitonin at hospital admission $\geq 0.12$ ng/mL <sup>b</sup>    | 0.92 (0.44 to 1.93)               | 0.828        |
| C-reactive protein at hospital admission $\geq 107$ mg/L <sup>b</sup> | 2.27 (1.08 to 4.75)               | <b>0.030</b> |

Abbreviations: SOFA, indicates sequential organ failure assessment; OR, odds ratio; CI, confidence interval; BMI, body mass index; PaO<sub>2</sub>, partial pressure of arterial oxygen; FiO<sub>2</sub>, fraction of inspired oxygen. Mixed-effects models with center variable as a random effect. Data are shown as estimated ORs (95% CIs) of the explanatory variables in the bacterial coinfection group. The P-value is based on the null hypothesis that all ORs relating to an explanatory variable equal unity (no effect). P-values marked in bold indicate numbers that are statistically significant on the 95% confidence limit. Area under the ROC curve, AUC for no septic shock model = 0.71 (95% CI 0.62 to 0.80); AUC for septic shock model = 0.76 (95% CI 0.70 to 0.82). <sup>a</sup> Adjusted for variables (age, sex, BMI, comorbidities, PaO<sub>2</sub>/FiO<sub>2</sub> ratio at hospital admission, leucocyte count  $\geq 11 \times 10^9$ /L, septic shock, and COVID-19 wave). <sup>b</sup> Cut-off value obtained from ROC curve for bacterial coinfection (value with a sensitivity of 80%).

**eTable 11. Association of procalcitonin and C-reactive protein with bacterial coinfection, using cut-off values of procalcitonin and C-reactive protein, by symptoms timing**

| Variables                                       | Adjusted OR (95% CI) <sup>a</sup> | P-value |
|-------------------------------------------------|-----------------------------------|---------|
| Early symptoms (<3 days) (N = 371)              |                                   |         |
| Procalcitonin $\geq 0.44$ ng/mL <sup>b</sup>    | 14.97 (0.96 to 234.03)            | 0.054   |
| C-reactive protein $\geq 58$ mg/L <sup>b</sup>  | 1.62 (0.08 to 31.51)              | 0.750   |
| Late symptoms ( $\geq 3$ days) (N = 3,667)      |                                   |         |
| Procalcitonin $\geq 0.11$ ng/mL <sup>b</sup>    | 1.08 (0.62 to 1.87)               | 0.783   |
| C-reactive protein $\geq 100$ mg/L <sup>b</sup> | 1.98 (0.90 to 4.36)               | 0.092   |

Abbreviations: OR indicates odds ratio; CI, confidence interval; BMI, body mass index; PaO<sub>2</sub>, partial pressure of arterial oxygen; FiO<sub>2</sub>, fraction of inspired oxygen. Mixed-effects models with center variable as a random effect. Data are shown as estimated ORs (95% CIs) of the explanatory variables in the bacterial coinfection group. The P-value is based on the null hypothesis that all ORs relating to an explanatory variable equal unity (no effect). P-values marked in bold indicate numbers that are statistically significant on the 95% confidence limit. Area under the ROC curve, AUC for early symptoms model = 1.00 (95% CI 0.99 to 1.00); AUC for late symptoms model = 0.79 (95% CI 0.75 to 0.83). <sup>a</sup> Adjusted for variables (age, sex, BMI, comorbidities, SOFA (without respiratory system component), PaO<sub>2</sub>/FiO<sub>2</sub> ratio at hospital admission, leucocyte count  $\geq 11 \times 10^9$ /L, septic shock, and COVID-19 wave). <sup>b</sup> Cut-off value obtained from ROC curve for bacterial coinfection (value with a sensitivity of 80%).

**eFigure 1. Flow diagram of the study population**

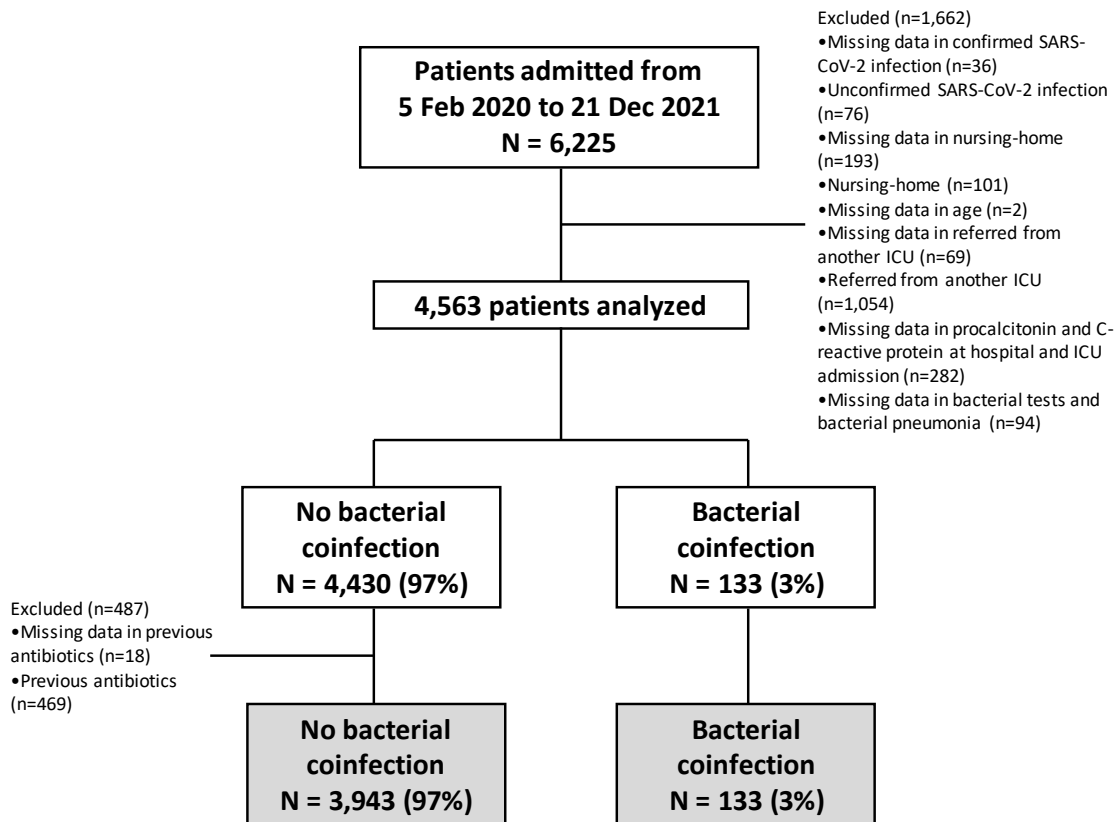

**eFigure 2. Receiver operating characteristic curve of procalcitonin and C-reactive protein for identification of bacterial coinfection**

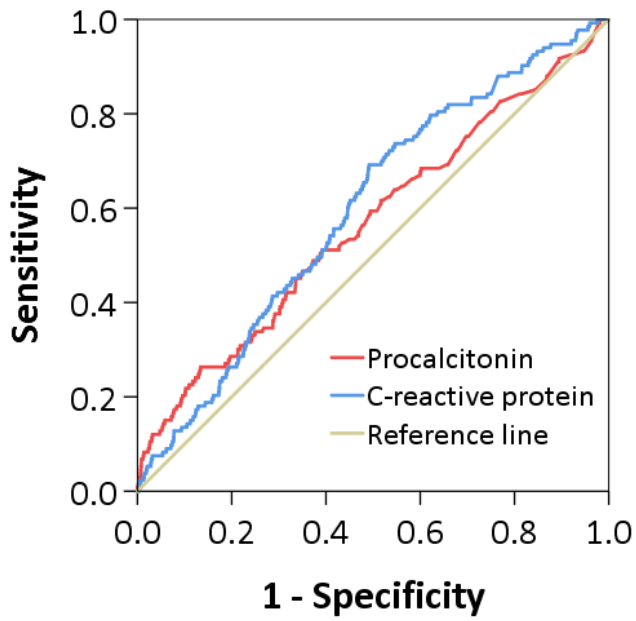

AUC=0.57 (95% CI 0.51 to 0.62) for procalcitonin and AUC=0.60 (95% CI 0.55 to 0.64) for C-reactive protein.

**eFigure 3. Receiver operating characteristic curve of procalcitonin and C-reactive protein for identification of bacterial coinfection according to septic shock (No septic shock - Panel A, Septic shock - Panel B)**

**Panel A**

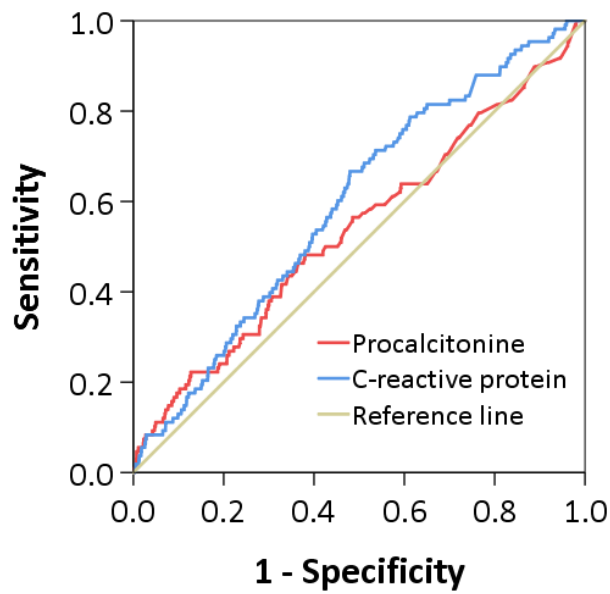

AUC=0.54 (95% CI 0.48 to 0.60) for procalcitonin and AUC=0.59 (95% CI 0.54 to 0.64) for C-reactive protein.

**Panel B**

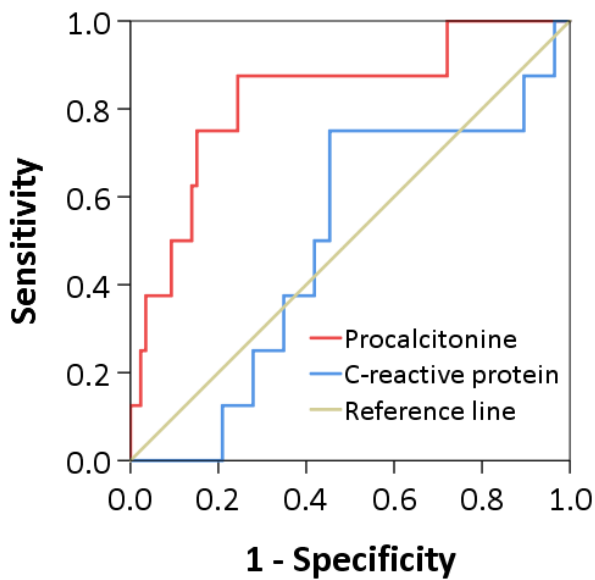

AUC=0.82 (95% CI 0.67 to 0.98) for procalcitonin and AUC=0.50 (95% CI 0.30 to 0.69) for C-reactive protein.



**eFigure 4. Receiver operating characteristic curve of procalcitonin and C-reactive protein for identification of bacterial coinfection according to SOFA (without respiratory system component) (<2 - Panel A, ≥2 - Panel B)**

**Panel A**

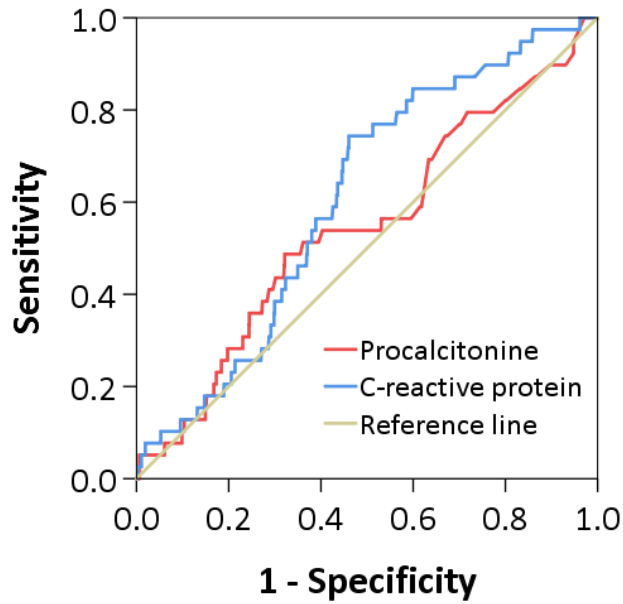

AUC=0.54 (95% CI 0.45 to 0.64) for procalcitonin and AUC=0.61 (95% CI 0.53 to 0.68) for C-reactive protein.

**Panel B**

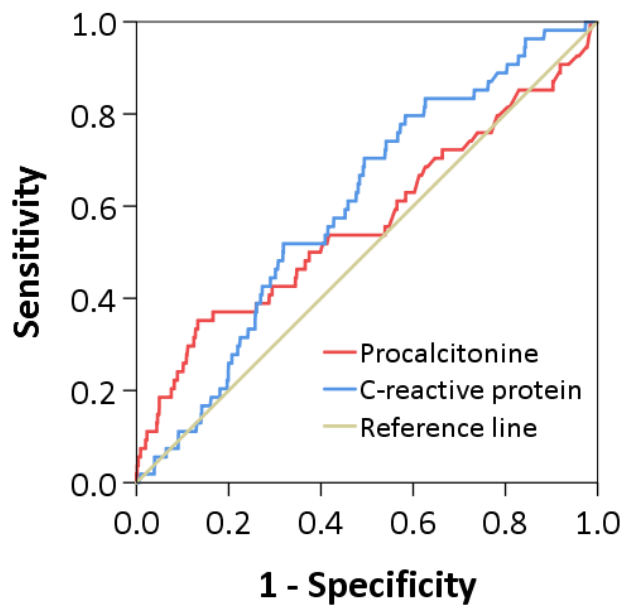

AUC=0.57 (95% CI 0.48 to 0.66) for procalcitonin and AUC=0.60 (95% CI 0.53 to 0.67) for C-reactive protein.

**eFigure 5. Procalcitonin (Panel A) and C-reactive protein (Panel B) according to time from first symptoms to hospital admission and bacterial coinfection**

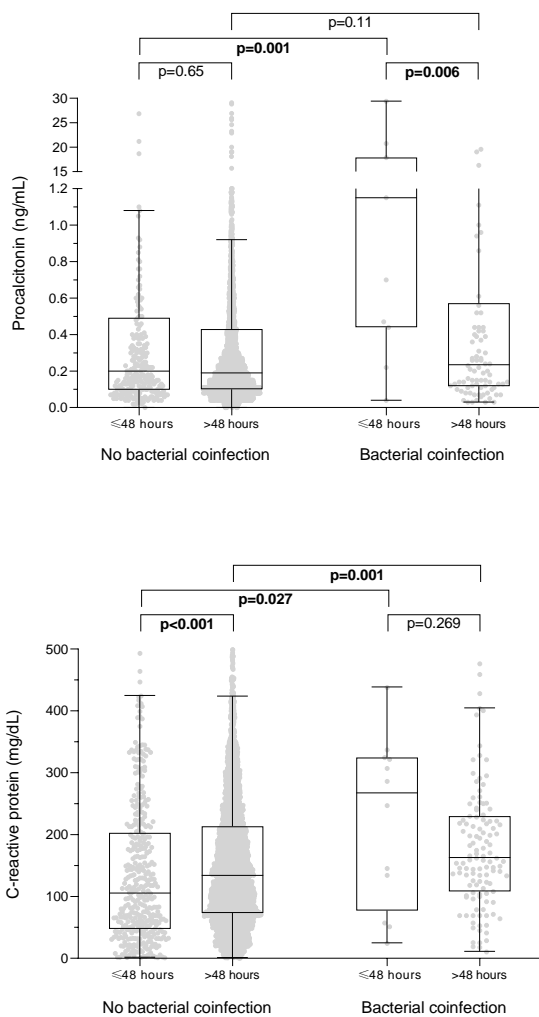

Mann-Whitney test indicated a statistically significant difference between groups ( $\leq 48$  vs  $> 48$  hours) in the no bacterial coinfection group for C-reactive protein ( $p < 0.001$ ), but not for procalcitonin ( $p = 0.65$ ), and a statistically significant difference between groups ( $\leq 48$  vs  $> 48$  hours) in the bacterial coinfection group for procalcitonin ( $p = 0.006$ ), but not for C-reactive protein ( $p = 0.269$ ). Mann-Whitney test indicated a statistically significant difference between groups (no bacterial coinfection vs bacterial coinfection) in the  $\leq 48$  hours group for C-reactive protein ( $p = 0.027$ ), and for procalcitonin ( $p = 0.001$ ), and a statistically significant difference between both groups (no bacterial coinfection vs bacterial coinfection) in the  $> 48$  hours group for C-reactive protein ( $p = 0.001$ ), but not for procalcitonin ( $p = 0.11$ ).

**eFigure 6. Receiver operating characteristic curve of procalcitonin and C-reactive protein for identification of bacterial coinfection according to time from first symptoms to hospital admission (<3 days - Panel A, ≥3 days - Panel B)**

**Panel A**

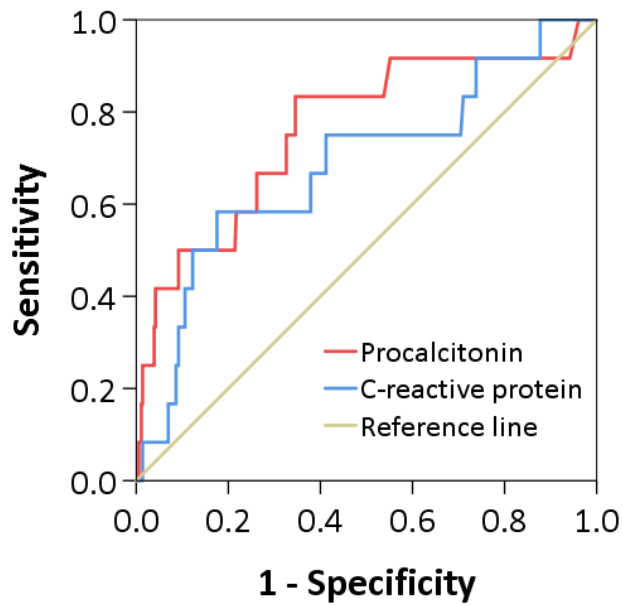

AUC=0.76 (95% CI 0.61 to 0.92) for procalcitonin and AUC=0.69 (95% CI 0.52 to 0.85) for C-reactive protein.

**Panel B**

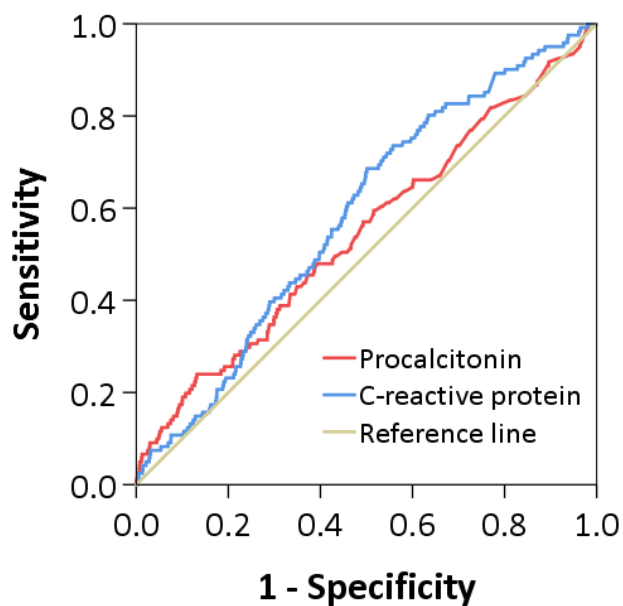

AUC=0.55 (95% CI 0.49 to 0.60) for procalcitonin and AUC=0.59 (95% CI 0.54 to 0.63) for C-reactive protein.
